CORRECTION

# Correction: Heterochromatin delays CRISPR-Cas9 mutagenesis but does not influence the outcome of mutagenic DNA repair

The PLOS Biology Staff

There is an error in the second sentence of the Author Summary. The correct sentence is: Imprinting has served as a model system to understand the mechanisms through which chromatin modifications can influence transcriptional regulation; comparisons between active and repressed alleles in the same cell nucleus provide an internal control for the effects of DNA sequence and exposure to diffusible regulators.

## Reference

1. Kallimasioti-Pazi EM, Thelakkad Chathoth K, Taylor GC, Meynert A, Ballinger T, Kelder MJE, et al. (2018) Heterochromatin delays CRISPR-Cas9 mutagenesis but does not influence the outcome of mutagenic DNA repair. PLoS Biol 16(12): e2005595. <https://doi.org/10.1371/journal.pbio.2005595> PMID: [30540740](https://pubmed.ncbi.nlm.nih.gov/30540740/)

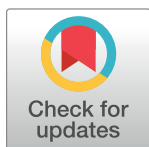

## OPEN ACCESS

**Citation:** The PLOS Biology Staff (2019) Correction: Heterochromatin delays CRISPR-Cas9 mutagenesis but does not influence the outcome of mutagenic DNA repair. PLoS Biol 17(2): e3000160. <https://doi.org/10.1371/journal.pbio.3000160>

**Published:** February 21, 2019

**Copyright:** © 2019 The PLOS Biology Staff. This is an open access article distributed under the terms of the [Creative Commons Attribution License](https://creativecommons.org/licenses/by/4.0/), which permits unrestricted use, distribution, and reproduction in any medium, provided the original author and source are credited.
